# Supplementary material for: Thermokarst amplifies fluvial inorganic carbon cycling and export across watershed scales on the Peel Plateau, Canada
Source: Copernicus journal article supplement (doi:10.5194/bg-17-5163-2020), 2020-10-26
Supplement: Supplementary file 2 [file bg-17-5163-2020-supplement.zip]

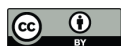

## *Supplement of*

# **Thermokarst amplifies fluvial inorganic carbon cycling and export across watershed scales on the Peel Plateau, Canada**

**Scott Zolkos et al.**

*Correspondence to:* Scott Zolkos ([sgzolkos@gmail.com](mailto:sgzolkos@gmail.com))

- [bg-17-5163-2020-supplement-title-page.pdf](#)
- [Zolkos ds01.xlsx](#)
- [Zolkos et al Biogeosciences 2020-03-26–Supplement.pdf](#)
- \_\_MACOSX
  - [.\\_Zolkos ds01.xlsx](#)
  - [.\\_Zolkos et al Biogeosciences 2020-03-26–Supplement.pdf](#)

The copyright of individual parts of the supplement might differ from the CC BY 4.0 License.
